# Supplementary material for: Machine-learning molecular dynamics simulations of shock response and spallation behavior in PPTA crystals
Source: Royal Society of Chemistry journal article supplement (doi:10.1039/d5cp00251f), 2025-01-01
Supplement: d5cp00251f1.pdf [file d5cp00251f1.pdf]

# Machine-Learning molecular dynamics simulations of Shock Response and Spallation Behavior in PPTA Crystals

Lei Liu<sup>1</sup>, Jingfu Shi<sup>1</sup>, Di Song<sup>2</sup>, Changqing Miao<sup>1\*</sup>

*1 National Key Laboratory of Science and Technology on Advanced Composites in Special Environment, Harbin*

*Institute of Technology, Harbin 150001, P. R. China.*

*2 School of Mechanical and Electrical Engineering, University of Electronic Science and Technology of China,*

*Chengdu, Sichuan 611731, PR China.*

\* Corresponding author Email: miaocq@hit.edu.cn

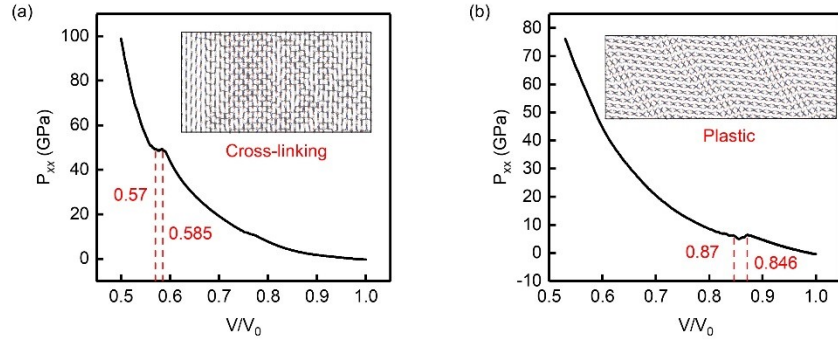

**Fig. S1.** The compressive stress ( $P_{xx}$ ) as a function of relative volume ( $V/V_0$ ) during dynamic compression along (a) the a-axis and (b) the b-axis of the PPTA crystal, respectively.

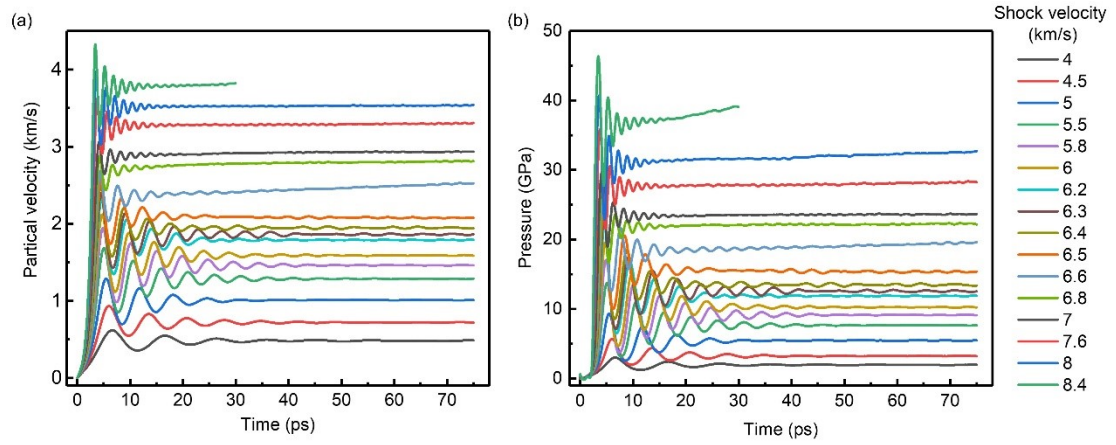

**Fig. S2.** Under shock compression along the a-axis of the PPTA crystal, the variations of (a) particle velocity and (b) system pressure with time at different shock velocities.

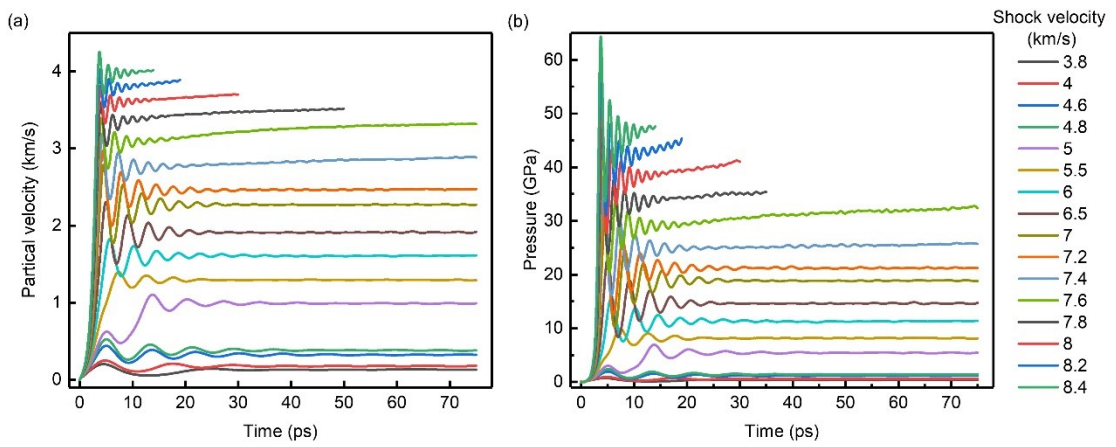

**Fig. S3.** Under shock compression along the b-axis of the PPTA crystal, the variations of (a) particle velocity and (b) system pressure with time at different shock velocities..

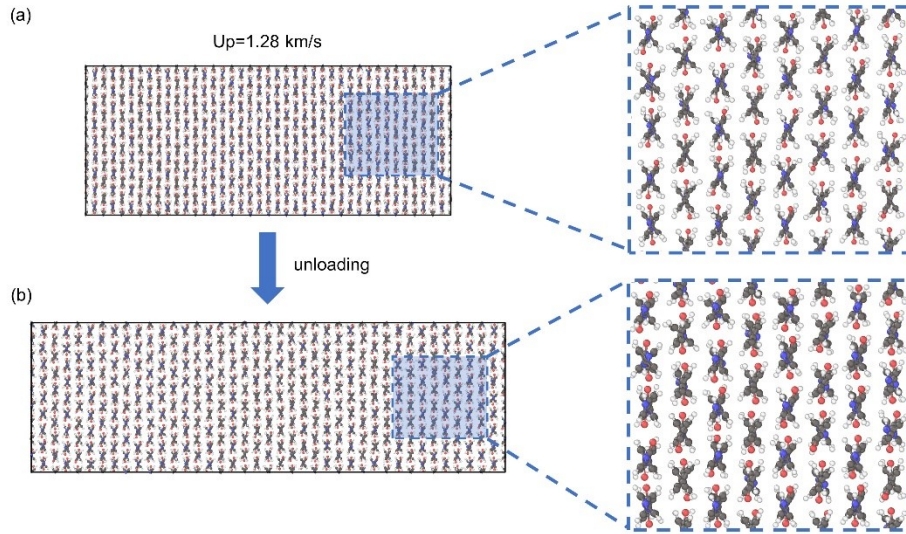

**Fig. S4.** Under shock compression along the a-axis of the PPTA crystal, (a) the atomic structure after shock compression and (b) the atomic structure after unloading and re-equilibration are shown for the elastic regime (using  $U_p = 1.28 \text{ km/s}$  as an example). The deformation in the elastic regime is almost entirely recoverable upon unloading.

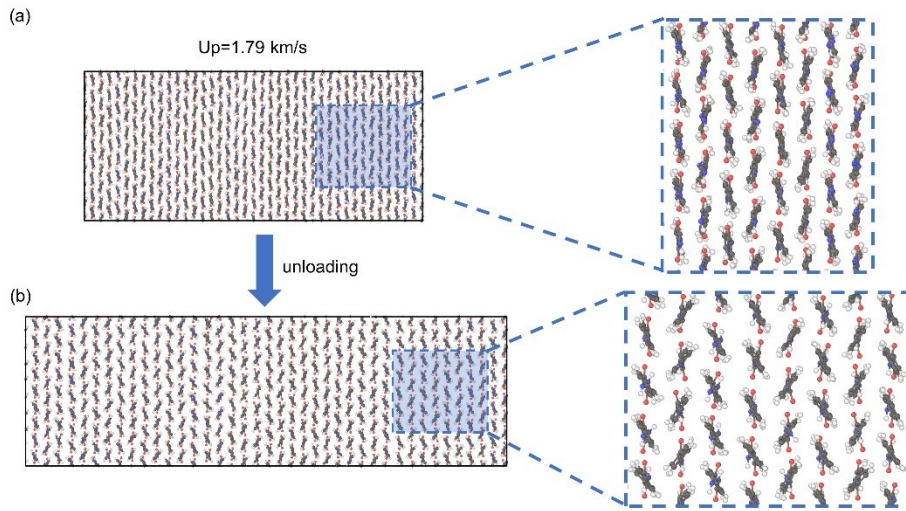

**Fig. S5.** Under shock compression along the a-axis of the PPTA crystal, (a) the atomic structure after shock compression and (b) the atomic structure after unloading and re-equilibration are shown for the plastic regime (using  $U_p = 1.79 \text{ km/s}$  as an example). The deformation in the plastic regime is not recoverable upon unloading.

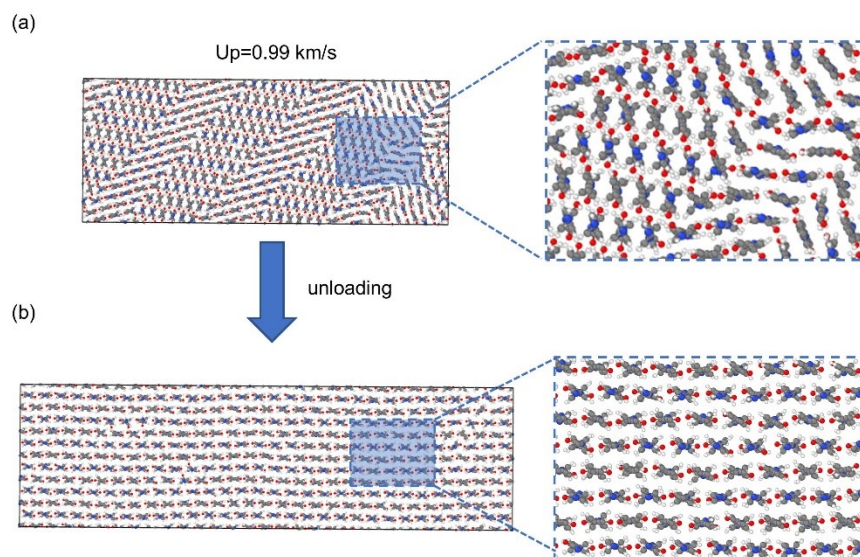

**Fig. S6.** Under shock compression along the b-axis of the PPTA crystal, (a) the atomic structure after shock compression and (b) the atomic structure after unloading and re-equilibration are shown for the plastic regime (using  $U_p=0.99$  km/s as an example). The deformation in this regime is almost entirely recoverable upon unloading.
